# Supplementary material
Source: PubMed Central journal article supplement (PMC6483510)
Supplement: jciinsight-4-122728-s016.pdf [file jciinsight-4-122728-s016.pdf]

# Change over 24 months

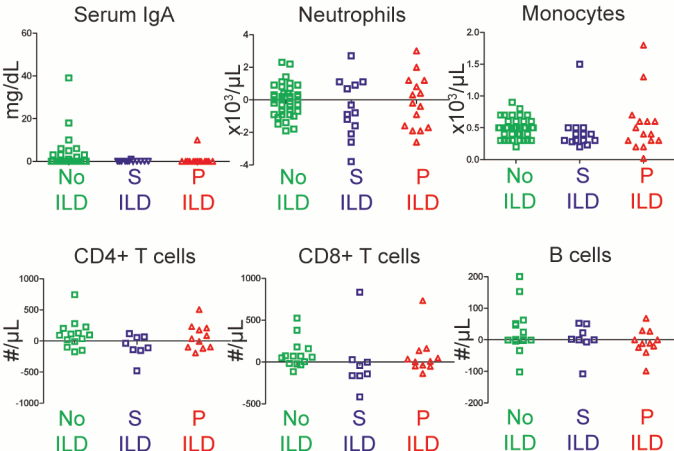



# PBMC

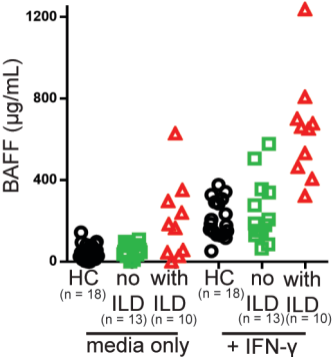



CD20

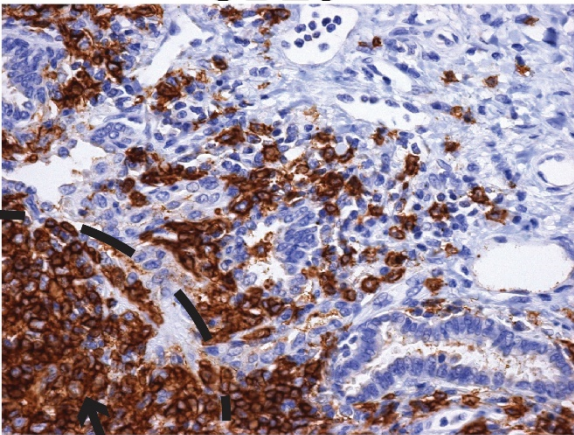

Follicle

Ki67

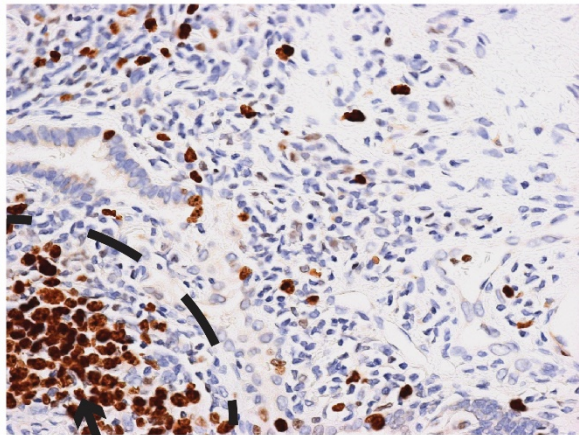

Follicle

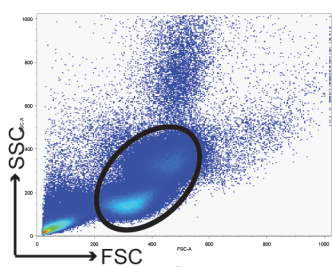

Singlets

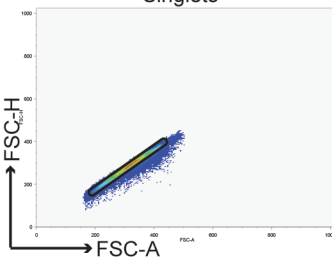

Live Cells

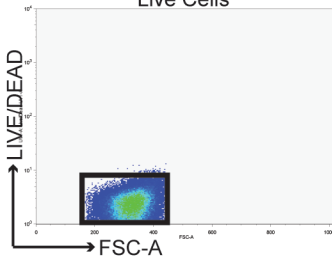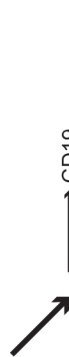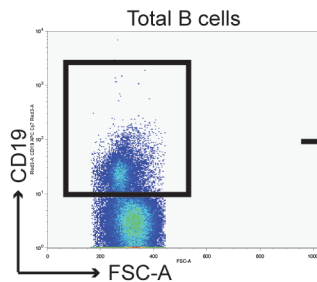

Total B cells

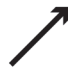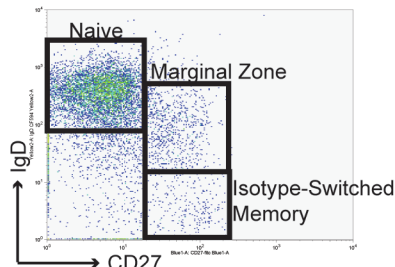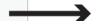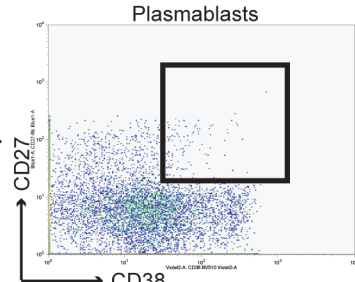

Plasmablasts

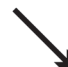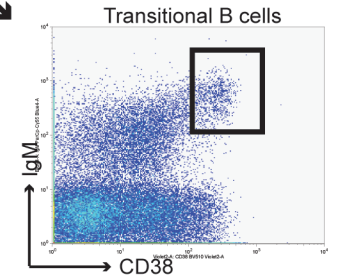

Transitional B cells

# CD138+ Plasma Cells

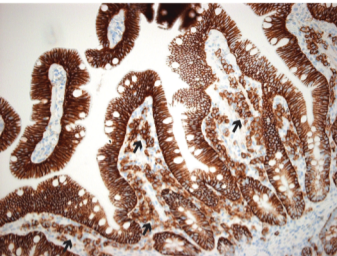

Healthy Control

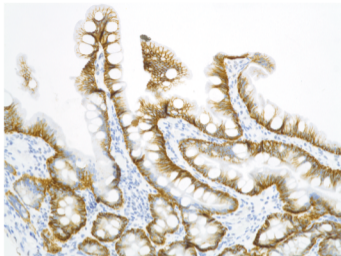

CVID ILD patient 1

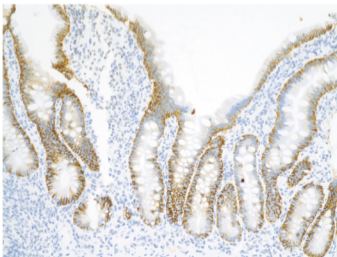

CVID ILD patient 2

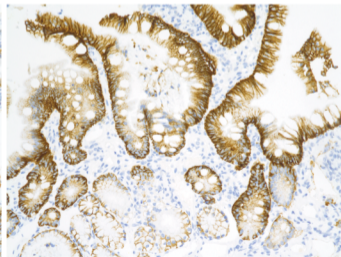

CVID ILD patient 3

38 **Supplementary Table 1.** Antibodies used for tissue immunofluorescence and  
 39 immunohistochemistry.

| <b>Antigen</b>    | <b>Clone</b> | <b>Source</b> | <b>Company</b>   |
|-------------------|--------------|---------------|------------------|
| BAFF              | 1D6          | mouse         | eBioscience      |
| BAFF-R            | EPR10914     | rabbit        | Abcam            |
| Bcl-1             | EP-12        | rabbit        | Dako             |
| Bcl-2             | 124          | mouse         | Dako             |
| CD14              | EPR3653      | rabbit        | Abcam            |
| CD20              | L26          | mouse         | Leica            |
| CD23              | 1B12         | mouse         | Leica            |
| CD27              | 137B4        | mouse         | Leica            |
| CD3               | LN10         | mouse         | Leica            |
| CD3               | CD3-12       | rat           | AbD Serotec      |
| CD38              | EPR4106      | rabbit        | Abcam            |
| Cleaved caspase-3 | polyclonal   | rabbit        | Abcam            |
| ELA               | polyclonal   | rabbit        | Abcam            |
| IgD               | polyclonal   | goat          | Southern Biotech |
| IgG               | JDC-10       | mouse         | Southern Biotech |
| IgM               | polyclonal   | rabbit        | Dako             |
| Ki67              | MIB-1        | mouse         | Dako             |
| TACI              | polyclonal   | rabbit        | Abcam            |

40

41



42 **Supplementary Table 2.** Antibodies used for mass cytometry.

| Metal | Marker                  | Clone            | Manufacturer             |
|-------|-------------------------|------------------|--------------------------|
| 89Y   | CD45                    | HI30             | Fluidigm                 |
| 113In | CD57                    | HCD57            | Biolegend                |
| 115In | CD11c                   | Bu15             | Biolegend                |
| 141Pr | IgD                     | IA6-02           | Biolegend                |
| 142Nd | CD19                    | HIB19            | Biolegend                |
| 143Nd | CD45RA                  | HI100            | Biolegend                |
| 144Nd | CD103                   | Ber-Act8         | Biolegend                |
| 145Nd | CD4                     | RPA-T4           | Biolegend                |
| 146Nd | CD8                     | RPA-T8           | Biolegend                |
| 147Sm | pSTAT5                  | 47               | Fluidigm                 |
| 148Nd | CD16                    | 3G8              | Biolegend                |
| 149Sm | CD127                   | REA614           | Miltenyi                 |
| 150Nd | CD1c                    | L161             | Biolegend                |
| 151Eu | CD123                   | 6H6              | Biolegend                |
| 152Sm | CD66b                   | G10F5            | Biolegend                |
| 153Eu | pSTAT1                  | 58D6             | Fluidigm                 |
| 154Sm | CD86                    | IT2.2            | Biolegend                |
| 155Gd | CD27                    | O323             | Biolegend                |
| 158Gd | CD33                    | WM53             | Biolegend                |
| 160Gd | CD14                    | M5E2             | Biolegend                |
| 161Dy | CD56                    | B159             | BD Biosciences           |
| 162Dy | CD20                    | 2H7              | Biolegend                |
| 163Dy | anti-APC /<br>APC BAFFR | APC003 /<br>8A7  | Biolegend /<br>Biolegend |
| 165Ho | Anti-<br>PE/PE_BAFF     | PE001/T7-<br>241 | Biolegend/Biolegend      |
| 166Er | CD169                   | 7-239            | Biolegend                |
| 168Er | CD3                     | UCHT1            | Biolegend                |
| 169Tm | STAT1                   | 10C4B40          | Biolegend                |
| 170Er | CD38                    | HB-7             | Biolegend                |
| 171Yb | CD161                   | HP-3G10          | Biolegend                |
| 174Yb | HLADR                   | L243             | Biolegend                |
| 209Bi | CD11b                   | ICRF44           | Fluidigm                 |

43
